# Supplementary material for: Multilayer Feedforward Artificial Neural Network Model to Forecast Florida Bay Salinity with Climate Change
Source: MDPI journal article supplement (doi:10.3390/w14213495), 2022-11-01
Supplement: s1 [file s1]

# Electronic Supplementary Material

## **Multilayer Feedforward Artificial Neural Network Model to Forecast Florida Bay Salinity with Climate Change**

Anteneh Z. Abiy<sup>1</sup>, Ruscena Wiederholt<sup>1</sup>, Gareth Lagerwall<sup>1</sup>, Assefa M. Melesse<sup>2</sup>, and Stephen E.  
Davis<sup>1</sup>

Author Information

Affiliations

<sup>1</sup>The Everglades Foundation, 18001 Old Cutler Road, Suite 625, Palmetto Bay, FL, 33157,  
U.S.A.

<sup>2</sup>Department of Earth and Environment, Florida International University, Miami, FL 33199,  
U.S.A.

Corresponding author

Ruscena Wiederholt

The Everglades Foundation, 18001 Old Cutler Road, Suite 625, Palmetto Bay, FL, 33157,  
U.S.A.

[ruscenawiederholt@gmail.com](mailto:ruscenawiederholt@gmail.com)

In this manuscript we have provided the following supplementary materials:

Datasets used for baseline and forecasted salinities

**Table S1 Classifications for Coastal Salinity Index values**

| <b>Coastal Salinity<br/>Classification</b> | <b>Description</b>                | <b>CSI Values</b> |
|--------------------------------------------|-----------------------------------|-------------------|
| CD4                                        | Exceptional salinity conditions   | -2.00 or less     |
| CD3                                        | Extreme salinity conditions       | -1.99 to -1.60    |
| CD2                                        | Severe salinity conditions        | -1.59 to -1.30    |
| CD1                                        | Moderate salinity conditions      | -1.29 to -0.80    |
| CD0                                        | Abnormal salinity conditions      | -0.79 to -0.50    |
| Normal                                     | Normal salinity conditions        | -0.49 to 0.50     |
| CW0                                        | Abnormal freshwater conditions    | 0.51 to 0.80      |
| CW1                                        | Moderate freshwater conditions    | 0.81 to 1.30      |
| CW2                                        | Severe freshwater conditions      | 1.31 to 1.60      |
| CW3                                        | Extreme freshwater conditions     | 1.61 to 2.00      |
| CW4                                        | Exceptional freshwater conditions | 2.01 or more      |

The index represents changes in monthly salinity conditions with respect to average conditions in a site. Negative values are the number of standard deviations below the mean and represent increasing saline conditions (coastal drought CD). Positive values are the number of standard deviations above the mean and represent increasing freshwater conditions.

**Table S2 Model performance evaluation for training and validation stages for every site**

| Site | Parameter | Training | Validation |
|------|-----------|----------|------------|
| MK   | $R^2$     | 0.85     | 0.701      |
|      | RMSE      | 1.33     | 1.89       |
| JK   | $R^2$     | 0.83     | 0.72       |
|      | RMSE      | 1.59     | 2.06       |
| GB   | $R^2$     | 0.85     | 0.72       |
|      | RMSE      | 4.03     | 5.69       |
| BK   | $R^2$     | 0.78     | 0.7        |
|      | RMSE      | 2.52     | 3.03       |
| TB   | $R^2$     | 0.83     | 0.71       |
|      | RMSE      | 4.35     | 5.88       |
| WB   | $R^2$     | 0.82     | 0.71       |

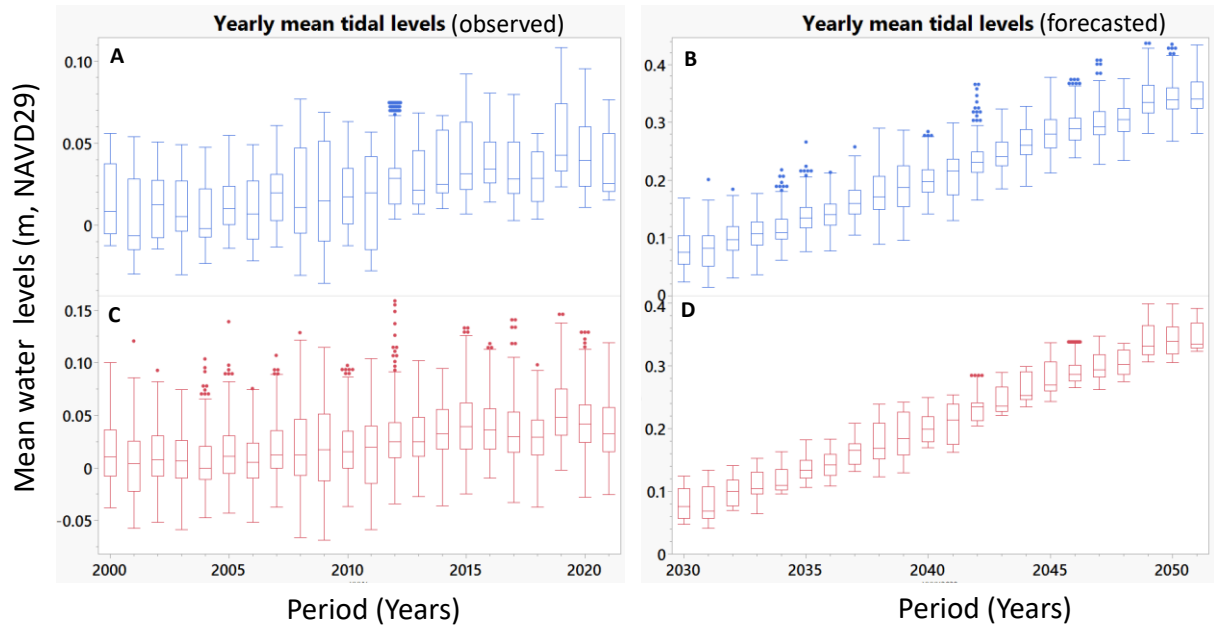

**Figure S1.** Annual observed sea level data (A), Annual forecasted sea level data (B), Low pass, smoothed observed sea level data (C), Low pass, smoothed forecasted sea level data

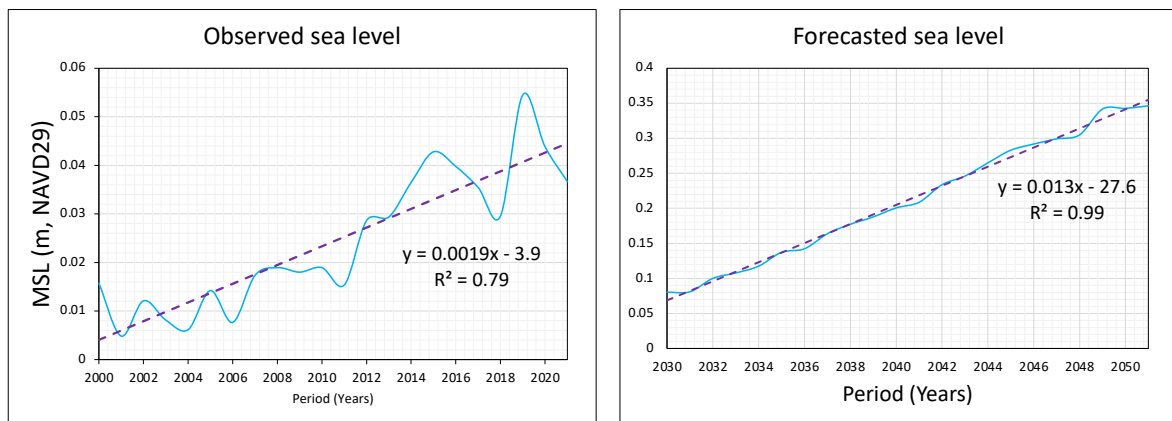

**Figure S2.** Observed and forecasted sea level with the regression trend line (dashed purple line), mean water levels (light blue line), regression equations, and R-squared values.
